# Supplementary material for: A Machine Learning Platform for Interconnecting Antibody-Drug Conjugate Cytotoxic Design with Tumor Cell Biology
Source: Research Square preprint supplement (doi:10.21203/rs.3.rs-6256038/v1), 2025-04-23
Supplement: Supplementary file 1 [file 114d45f3ecae05aaf488ff50.docx]

**Supplemental Information - A Machine Learning Platform for Interconnecting Antibody-Drug Conjugate Cytotoxic Design with Tumor Cell Biology**

Hasem Mslati1, Gaël Coulombe2, Mehdi Ezzine2, Tiana Yuen2, Francesco Gentile2,3*, and Jeffrey V. Leyton1,4*

1Department of Cellular and Molecular Medicine, Faculty of Medicine, University of Ottawa, Ottawa, Ontario, Canada

2Department of Chemistry and Biomolecular Sciences, Faculty of Science, University of Ottawa, Ottawa, Ontario, Canada

3Ottawa Institute of Systems Biology, Ottawa, Ontario, Canada

4School of Pharmaceutical Sciences, Faculty of Medicine, University of Ottawa, Ottawa, Ontario, Canada

* Correspondence to: [fgentile@uottawa.ca](mailto:fgentile@uottawa.ca) and [vleyton@uottawa.ca](mailto:vleyton@uottawa.ca)

**Supplemental Table 1:** Real-world and blinded ADC cytotoxicity IC50 values and associate AMM predictions at 10 nM threshold.

| Cell Line | Her2 predicted intensity | T-Dm1 (Nm) | Predicted | T-Dxd (Nm) | Predicted | Disitamab-Vc-Mmae† (Nm) | Predicted | T-Pacf-Amberstatin 269 (Nm) | Predicted |
| --- | --- | --- | --- | --- | --- | --- | --- | --- | --- |
| SK-BR-3 | 7.46 | 0.11 | 0.97 | 1.06 | 0.95 | 0.05 | 0.91 | ND |  |
| UACC-812 | 10.34 | 0.22 | 0.88 | 0.31 | 0.86 | 0.08 | 0.73 | ND |  |
| EFM-192A | 8.42 | 0.07 | 0.93 | 0.35 | 0.91 | 0.22 | 0.82 | ND |  |
| BT-474 | 7.32 | 0.24 | 0.94 | 0.6 | 0.92 | 0.22 | 0.84 | ND |  |
| JIMT-1* | 5.31 | 7.62, 6.89 | 0.32 | NR | 0.28‡ | 0.33 | 0.11 | 0.23 | 0.56 |
| OE19* | 10.15 | 1.66, 0.3 | 0.83 | NR | 0.8‡ | 0.25 | 0.62 | 0.22 | 0.9 |
| NCI-N87* | 10.59 | 0.88, 0.24 | 0.86 | 0.71 | 0.83 | 0.19 | 0.68 | 0.07 | 0.92 |
| SNU-216† | 4.92 | NR | 0.03‡ | NR | 0.28‡ | NR | 0.11‡ | ND |  |
| Hs-578T | 3.09 | NR | 0.06‡ | NR | 0.06‡ | NR | 0.02‡ | ND |  |

* Results from two biological repeat assays

† ADC and cell line combination not in training set

ND = Not determined and NR = IC50 value not reached

‡ Virtual IC50 values set at 1000 nM

**Supplemental Table 2:** Real-world and blinded ADC cytotoxicity IC50 values and associate AMM predictions at 5 nM threshold.

| Cell line | HER2 predicted intensity | T-DM1 (nM) | Predicted | T-Dxd (nM) | Predicted | Disitamab-vc-MMAE† (nM) | Predicted | T-pAcF-Amberstatin 269 (nM) | Predicted |
| --- | --- | --- | --- | --- | --- | --- | --- | --- | --- |
| SK-BR-3 | 7.46 | 0.11 | 0.98 | 1.06 | 0.97 | 0.05 | 0.98 | ND |  |
| UACC-812 | 10.34 | 0.22 | 0.94 | 0.31 | 0.93 | 0.08 | 0.94 | ND |  |
| EFM-192A | 8.42 | 0.07 | 0.96 | 0.35 | 0.91 | 0.22 | 0.96 | ND |  |
| BT-474 | 7.32 | 0.24 | 0.96 | 0.6 | 0.95 | 0.22 | 0.96 | ND |  |
| JIMT-1* | 5.31 | 7.62, 6.89 | 0.47 | NR | 0.43‡ | 0.33 | 0.47 | 0.23 | 0.54 |
| OE19* | 10.15 | 1.66, 0.3 | 0.89 | NR | 0.87‡ | 0.25 | 0.89 | 0.22 | 0.92 |
| NCI-N87* | 10.59 | 0.88, 0.24 | 0.95 | 0.71 | 0.94 | 0.19 | 0.95 | 0.07 | 0.96 |
| SNU-216† | 4.92 | NR | 0.64‡ | NR | 0.60‡ | NR | 0.64‡ | ND |  |
| Hs-578T | 3.09 | NR | 0.10‡ | NR | 0.09‡ | NR | 0.10‡ | ND |  |

* Results from two biological repeat assays

† ADC and cell line combination not in training set

ND = Not determined and NR = IC50 value not reached

‡ Virtual IC50 values set at 1000 nM

**Supplemental Table 3:** Real-world and blinded ADC cytotoxicity IC50 values and associate AMM predictions at 1 nM threshold.

| Cell line | HER2 predicted intensity | T-DM1 (nM) | Predicted | T-Dxd (nM) | Predicted | Disitamab-vc-MMAE† (nM) | Predicted | T-pAcF-Amberstatin 269 (nM) | Predicted |
| --- | --- | --- | --- | --- | --- | --- | --- | --- | --- |
| SK-BR-3 | 7.46 | 0.11 | 0.86 | 1.06 | 0.70 | 0.05 | 0.75 | ND |  |
| UACC-812 | 10.34 | 0.22 | 0.73 | 0.31 | 0.57 | 0.08 | 0.61 | ND |  |
| EFM-192A | 8.42 | 0.07 | 0.77 | 0.35 | 0.59 | 0.22 | 0.63 | ND |  |
| BT-474 | 7.32 | 0.24 | 0.71 | 0.6 | 0.52 | 0.22 | 0.56 | ND |  |
| JIMT-1* | 5.31 | 7.62, 6.89 | 0.17 | NR | 0.09‡ | 0.33 | 0.11 | 0.23 | 0.29 |
| OE19* | 10.15 | 1.66, 0.3 | 0.80 | NR | 0.65‡ | 0.25 | 0.69 | 0.22 | 0.88 |
| NCI-N87* | 10.59 | 0.88, 0.24 | 0.80 | 0.71 | 0.65 | 0.19 | 0.67 | 0.07 | 0.88 |
| SNU-216† | 4.92 | NR | 0.16‡ | NR | 0.08‡ | NR | 0.09‡ | ND |  |
| Hs-578T | 3.09 | NR | 0.01‡ | NR | 0.006‡ | NR | 0.07‡ | ND |  |

* Results from two biological repeat assays

† ADC and cell line combination not in training set

ND = Not determined and NR = IC50 value not reached

‡ Virtual IC50 values set at 1000 nM

**Supplemental Table 4.** Best hyperparameters for the AMM model at 10 nM threshold, identified with Optuna hyperparameter optimization.

| **Feature Stream** | **Data Inputs and Descriptors** | **Initial Linear Transform (Input → Output Dimensions)** | **CNN Architecture** | **CNN Output Dimensions** |
| --- | --- | --- | --- | --- |
| Stream 1 (DAR and ESM) | DAR and intracellular targets (4 features) | 4 → 4 for DAR and Targets | One-layer CNN with 16 hidden channels, kernel size of 3, dropout of 15 percent, followed by global average pooling | 16 |
| PCA-reduced ESM antigen embeddings (356 features) | 356 → 128 for ESM |  |  |
|  | Both outputs concatenated into a single 132-dimensional input |  |  |
| Stream 2 (Antigen and mRNA) | Predicted antigen intensity (1 feature) | 1 → 4 for Antigen Intensity | One-layer CNN with 64 hidden channels, kernel size of 5, no dropout, followed by global average pooling | 64 |
| mRNA cell line embeddings from the GENCEP model (512 features) | 512 → 128 for mRNA Cell Line Embeddings |  |  |
| Antigen-specific mRNA read counts’ embeddings from the GENCEP model (64 features) | 64 → 64 for Gene-Specific Read Counts |  |  |
| Additional pharmacokinetic-related genes of mRNA and proteomic features from the GENCEP model (27 features) | 27 → 16 for Scaled mRNA Features |  |  |
|  | All outputs concatenated into a single 212-dimensional input |  |  |
| Stream 3 (Chemistry) | 200 RDKit descriptors (example : Balaban J, Bertz CT, Chi indices, EState, TPSA, etc.) | 200 → 128 for RDKit-based descriptors | Two-layer CNN with 128 hidden channels, kernel size of 3, dropout of 15 percent, followed by global average pooling | 128 |
| 167-bit MACCS molecular fingerprints | 167 → 128 for Molecular Fingerprints |  |  |
|  | Both outputs concatenated into a single 256-dimensional input |  |  |
| Attention Mechanism | Produces a combined embedding across all streams | Attention layer with a hidden dimension of 128 |  | Attention-weighted combined embedding |
| Fully Connected Classifier | Refines the combined embedding | Combined embedding → 128; Fully connected layer with dropout of 15 percent, ReLU activation, batch normalization, and sigmoid output | Outputs binary probability for IC50 less than 10 nM |  |
| Training Hyperparameters | Learning rate: 4.71E -4 |  | Optimizer: Adam, Batch size: 32, Weight decay: 1E -5 |  |

**Supplemental Table 6.** Best hyperparameters for the AMM model at 5 nM threshold, identified with Optuna hyperparameter optimization.

| **Feature Stream** | **Data Inputs and Descriptors** | **Initial Linear Transform (Input → Output Dimensions)** | **CNN Architecture** | **CNN Output Dimensions** |
| --- | --- | --- | --- | --- |
| **Stream 1 (DAR and ESM)** | DAR and intracellular targets (4 features) | 4 → 8 for DAR and Targets | Three-layer CNN with 16 hidden channels, kernel size of 1, dropout of 15% followed by global average pooling | 16 |
|  | PCA-reduced ESM antigen embeddings (356 features) | 356 → 256 for ESM |  |  |
|  | Both outputs concatenated into a single 264-dimensional input |  |  |  |
| **Stream 2 (Antigen and mRNA)** | Predicted antigen intensity (1 feature) | 1 → 4 for Antigen Intensity | Two-layer CNN with 64 hidden channels, kernel size of 3, no dropout, followed by global average pooling | 64 |
|  | mRNA cell line embeddings from the GENCEP model (512 features) | 512 → 128 for mRNA Cell Line Embeddings |  |  |
|  | Antigen-specific mRNA read counts’ embeddings from the GENCEP model (64 features) | 64 → 64 for Gene-Specific Read Counts |  |  |
|  | Additional pharmacokinetic-related genes of mRNA and proteomic features from the GENCEP model (27 features) | 27 → 16 for Scaled mRNA Features |  |  |
|  | All outputs concatenated into a single 212-dimensional input |  |  |  |
| **Stream 3 (Chemistry)** | 200 RDKit descriptors (example: Balaban J, Bertz CT, Chi indices, EState, TPSA, etc.) | 200 → 256 for RDKit-based descriptors | One-layer CNN with 32 hidden channels, kernel size of 3, dropout of 15% followed by global average pooling | 32 |
|  | 167-bit MACCS molecular fingerprints | 167 → 64 for Molecular Fingerprints |  |  |
|  | Both outputs concatenated into a single 320-dimensional input |  |  |  |
| **Attention Mechanism** | Produces a combined embedding across all streams | Attention layer with a hidden dimension of 128 |  | Attention-weighted combined embedding |
| **Fully Connected Classifier** | Refines the combined embedding | Combined embedding → 128; Fully connected layer with dropout of 15%, ReLU activation, batch normalization, and sigmoid output |  | Outputs binary probability for IC50 less than 5 nM |
| **Training Hyperparameters** | Learning rate: 4.71E-4 |  | Optimizer: Adam, Batch size: 32, Weight decay: 1E-5 |  |

**Supplemental Table 5.** Best hyperparameters for the AMM model at 1 nM threshold, identified with Optuna hyperparameter optimization.

| **Feature Stream** | **Data Inputs and Descriptors** | **Initial Linear Transform (Input → Output Dimensions)** | **CNN Architecture** | **CNN Output Dimensions** |
| --- | --- | --- | --- | --- |
| **Stream 1 (DAR and ESM)** | DAR and intracellular targets (4 features) | 4 → 4 for DAR and Targets | Three-layer CNN with 16 hidden channels, kernel size of 1, dropout of 15% followed by global average pooling | 16 |
|  | PCA-reduced ESM antigen embeddings (356 features) | 356 → 256 for ESM |  |  |
|  | Both outputs concatenated into a single 260-dimensional input |  |  |  |
| **Stream 2 (Antigen and mRNA)** | Predicted antigen intensity (1 feature) | 1 → 4 for Antigen Intensity | One-layer CNN with 128 hidden channels, kernel size of 5, no dropout, followed by global average pooling | 128 |
|  | mRNA cell line embeddings from the GENCEP model (512 features) | 512 → 128 for mRNA Cell Line Embeddings |  |  |
|  | Antigen-specific mRNA read counts’ embeddings from the GENCEP model (64 features) | 64 → 64 for Gene-Specific Read Counts |  |  |
|  | Additional pharmacokinetic-related genes of mRNA and proteomic features from the GENCEP model (27 features) | 27 → 16 for Scaled mRNA Features |  |  |
|  | All outputs concatenated into a single 212-dimensional input |  |  |  |
| **Stream 3 (Chemistry)** | 200 RDKit descriptors (example: Balaban J, Bertz CT, Chi indices, EState, TPSA, etc.) | 200 → 256 for RDKit-based descriptors | Two-layer CNN with 64 hidden channels, kernel size of 3, dropout of 15% followed by global average pooling | 64 |
|  | 167-bit MACCS molecular fingerprints | 167 → 256 for Molecular Fingerprints |  |  |
|  | Both outputs concatenated into a single 512-dimensional input |  |  |  |
| **Attention Mechanism** | Produces a combined embedding across all streams | Attention layer with a hidden dimension of 128 |  | Attention-weighted combined embedding |
| **Fully Connected Classifier** | Refines the combined embedding | Combined embedding → 128; Fully connected layer with dropout of 15%, ReLU activation, batch normalization, and sigmoid output |  | Outputs binary probability for IC50 less than 1 nM |
| **Training Hyperparameters** | Learning rate: 4.71E-4 |  | Optimizer: Adam, Batch size: 32, Weight decay: 1E-5 |  |

**Supplemental Table 7.** Blind external test set of ADCs predicted for *in vitro* activities using the AMM model.

| **Linker-Payload SMILES** | **ADC Name** | **Cell Line Tested** | **Antigen Symbol** | **Drug-Antibody Ratio** | **Intracellular Target** | **IC50 (nM)** | **Predicted Protein Expression Intensity** |
| --- | --- | --- | --- | --- | --- | --- | --- |
| O=C(C=CC1=O)N1CCCCCC(NCC(NCC(N[C@@H](CC2=CC=CC=C2)C(NCC(NCOCC(N[C@@H]3C4=C5C(C(N6C5)=CC([C@](O)(C(OC7)=O)CC)=C7C6=O)=NC8=CC(F)=C(C)C(CC3)=C48)=O)=O)=O)=O)=O)=O | Trastuzumab deruxtecan | SK-BR-3 | HER-2 | 8 | Topoisomerase I | 10.53 | 7.46 |
| O=C(C=CC1=O)N1CCCCCC(NCC(NCC(N[C@@H](CC2=CC=CC=C2)C(NCC(NCOCC(N[C@@H]3C4=C5C(C(N6C5)=CC([C@](O)(C(OC7)=O)CC)=C7C6=O)=NC8=CC(F)=C(C)C(CC3)=C48)=O)=O)=O)=O)=O)=O | Trastuzumab deruxtecan | UACC-812 | HER-2 | 8 | Topoisomerase I | 3.05 | 10.34 |
| O=C(C=CC1=O)N1CCCCCC(NCC(NCC(N[C@@H](CC2=CC=CC=C2)C(NCC(NCOCC(N[C@@H]3C4=C5C(C(N6C5)=CC([C@](O)(C(OC7)=O)CC)=C7C6=O)=NC8=CC(F)=C(C)C(CC3)=C48)=O)=O)=O)=O)=O)=O | Trastuzumab deruxtecan | EFM-192A | HER-2 | 8 | Topoisomerase I | 3.51 | 8.42 |
| O=C(C=CC1=O)N1CCCCCC(NCC(NCC(N[C@@H](CC2=CC=CC=C2)C(NCC(NCOCC(N[C@@H]3C4=C5C(C(N6C5)=CC([C@](O)(C(OC7)=O)CC)=C7C6=O)=NC8=CC(F)=C(C)C(CC3)=C48)=O)=O)=O)=O)=O)=O | Trastuzumab deruxtecan | BT-474 | HER-2 | 8 | Topoisomerase I | 5.96 | 7.32 |
| O=C(C=CC1=O)N1CCCCCC(NCC(NCC(N[C@@H](CC2=CC=CC=C2)C(NCC(NCOCC(N[C@@H]3C4=C5C(C(N6C5)=CC([C@](O)(C(OC7)=O)CC)=C7C6=O)=NC8=CC(F)=C(C)C(CC3)=C48)=O)=O)=O)=O)=O)=O | Trastuzumab deruxtecan | JIMT-1 | HER-2 | 8 | Topoisomerase I | Insensitive | 5.31 |
| O=C(C=CC1=O)N1CCCCCC(NCC(NCC(N[C@@H](CC2=CC=CC=C2)C(NCC(NCOCC(N[C@@H]3C4=C5C(C(N6C5)=CC([C@](O)(C(OC7)=O)CC)=C7C6=O)=NC8=CC(F)=C(C)C(CC3)=C48)=O)=O)=O)=O)=O)=O | Trastuzumab deruxtecan | OE19 | HER-2 | 8 | Topoisomerase I | Insensitive | 10.15 |
| O=C(C=CC1=O)N1CCCCCC(NCC(NCC(N[C@@H](CC2=CC=CC=C2)C(NCC(NCOCC(N[C@@H]3C4=C5C(C(N6C5)=CC([C@](O)(C(OC7)=O)CC)=C7C6=O)=NC8=CC(F)=C(C)C(CC3)=C48)=O)=O)=O)=O)=O)=O | Trastuzumab deruxtecan | NCI-N87 | HER-2 | 8 | Topoisomerase I | 7.02 | 10.59 |
| O=C(C=CC1=O)N1CCCCCC(NCC(NCC(N[C@@H](CC2=CC=CC=C2)C(NCC(NCOCC(N[C@@H]3C4=C5C(C(N6C5)=CC([C@](O)(C(OC7)=O)CC)=C7C6=O)=NC8=CC(F)=C(C)C(CC3)=C48)=O)=O)=O)=O)=O)=O | Trastuzumab deruxtecan | SNU-216 | HER-2 | 8 | Topoisomerase I | Insensitive | 4.92 |
| O=C(C=CC1=O)N1CCCCCC(NCC(NCC(N[C@@H](CC2=CC=CC=C2)C(NCC(NCOCC(N[C@@H]3C4=C5C(C(N6C5)=CC([C@](O)(C(OC7)=O)CC)=C7C6=O)=NC8=CC(F)=C(C)C(CC3)=C48)=O)=O)=O)=O)=O)=O | Trastuzumab deruxtecan | Hs-578-T | HER-2 | 8 | Topoisomerase I | Insensitive | 3.09 |
| C[C@]1([C@@](CC(N(C(C=C2C=C3OC)=C3Cl)C)=O)([H])OC([C@H](C)N(C)C(CCS[C@@H](CC4=O)C(N4C[C@@H]5CC[C@@H](C(NCCCC[C@H](N)C(O)=O)=O)CC5)=O)=O)=O)[C@H]([C@@H]([C@](OC6=O)([H])C[C@]([C@](/C=C/C=C(C)/C2)([H])OC)(N6)O)C)O1 | Ado-Trastuzumab emtansine | SK-BR-3 | HER-2 | 3.5 | Microtubule | 1.13 | 7.46 |
| C[C@]1([C@@](CC(N(C(C=C2C=C3OC)=C3Cl)C)=O)([H])OC([C@H](C)N(C)C(CCS[C@@H](CC4=O)C(N4C[C@@H]5CC[C@@H](C(NCCCC[C@H](N)C(O)=O)=O)CC5)=O)=O)=O)[C@H]([C@@H]([C@](OC6=O)([H])C[C@]([C@](/C=C/C=C(C)/C2)([H])OC)(N6)O)C)O1 | Ado-Trastuzumab emtansine | UACC-812 | HER-2 | 3.5 | Microtubule | 2.18 | 10.34 |
| C[C@]1([C@@](CC(N(C(C=C2C=C3OC)=C3Cl)C)=O)([H])OC([C@H](C)N(C)C(CCS[C@@H](CC4=O)C(N4C[C@@H]5CC[C@@H](C(NCCCC[C@H](N)C(O)=O)=O)CC5)=O)=O)=O)[C@H]([C@@H]([C@](OC6=O)([H])C[C@]([C@](/C=C/C=C(C)/C2)([H])OC)(N6)O)C)O1 | Ado-Trastuzumab emtansine | EFM-192A | HER-2 | 3.5 | Microtubule | 0.73 | 8.42 |
| C[C@]1([C@@](CC(N(C(C=C2C=C3OC)=C3Cl)C)=O)([H])OC([C@H](C)N(C)C(CCS[C@@H](CC4=O)C(N4C[C@@H]5CC[C@@H](C(NCCCC[C@H](N)C(O)=O)=O)CC5)=O)=O)=O)[C@H]([C@@H]([C@](OC6=O)([H])C[C@]([C@](/C=C/C=C(C)/C2)([H])OC)(N6)O)C)O1 | Ado-Trastuzumab emtansine | BT-474 | HER-2 | 3.5 | Microtubule | 2.38 | 7.32 |
| C[C@]1([C@@](CC(N(C(C=C2C=C3OC)=C3Cl)C)=O)([H])OC([C@H](C)N(C)C(CCS[C@@H](CC4=O)C(N4C[C@@H]5CC[C@@H](C(NCCCC[C@H](N)C(O)=O)=O)CC5)=O)=O)=O)[C@H]([C@@H]([C@](OC6=O)([H])C[C@]([C@](/C=C/C=C(C)/C2)([H])OC)(N6)O)C)O1 | Ado-Trastuzumab emtansine | JIMT-1 | HER-2 | 3.5 | Microtubule | 75.64 | 5.31 |
| C[C@]1([C@@](CC(N(C(C=C2C=C3OC)=C3Cl)C)=O)([H])OC([C@H](C)N(C)C(CCS[C@@H](CC4=O)C(N4C[C@@H]5CC[C@@H](C(NCCCC[C@H](N)C(O)=O)=O)CC5)=O)=O)=O)[C@H]([C@@H]([C@](OC6=O)([H])C[C@]([C@](/C=C/C=C(C)/C2)([H])OC)(N6)O)C)O1 | Ado-Trastuzumab emtansine | OE19 | HER-2 | 3.5 | Microtubule | 16.48 | 10.15 |
| C[C@]1([C@@](CC(N(C(C=C2C=C3OC)=C3Cl)C)=O)([H])OC([C@H](C)N(C)C(CCS[C@@H](CC4=O)C(N4C[C@@H]5CC[C@@H](C(NCCCC[C@H](N)C(O)=O)=O)CC5)=O)=O)=O)[C@H]([C@@H]([C@](OC6=O)([H])C[C@]([C@](/C=C/C=C(C)/C2)([H])OC)(N6)O)C)O1 | Ado-Trastuzumab emtansine | NCI-N87 | HER-2 | 3.5 | Microtubule | 8.74 | 10.59 |
| C[C@]1([C@@](CC(N(C(C=C2C=C3OC)=C3Cl)C)=O)([H])OC([C@H](C)N(C)C(CCS[C@@H](CC4=O)C(N4C[C@@H]5CC[C@@H](C(NCCCC[C@H](N)C(O)=O)=O)CC5)=O)=O)=O)[C@H]([C@@H]([C@](OC6=O)([H])C[C@]([C@](/C=C/C=C(C)/C2)([H])OC)(N6)O)C)O1 | Ado-Trastuzumab emtansine | SNU-216 | HER-2 | 3.5 | Microtubule | Insensitive | 4.92 |
| C[C@]1([C@@](CC(N(C(C=C2C=C3OC)=C3Cl)C)=O)([H])OC([C@H](C)N(C)C(CCS[C@@H](CC4=O)C(N4C[C@@H]5CC[C@@H](C(NCCCC[C@H](N)C(O)=O)=O)CC5)=O)=O)=O)[C@H]([C@@H]([C@](OC6=O)([H])C[C@]([C@](/C=C/C=C(C)/C2)([H])OC)(N6)O)C)O1 | Ado-Trastuzumab emtansine | Hs-578-T | HER-2 | 3.5 | Microtubule | Insensitive | 3.09 |
| CC(C)[C@@H](C(N[C@@H](CCCNC(N)=O)C(NC1=CC=C(COC(N(C)[C@@H](C(C)C)C(N[C@@H](C(C)C)C(N([C@@H]([C@@H](C)CC)[C@H](OC)CC(N2[C@@]([C@H](OC)[C@@H](C)C(N[C@H](C)[C@@H](O)C3=CC=CC=C3)=O)([H])CCC2)=O)C)=O)=O)=O)C=C1)=O)=O)NC(CCCCCN4C(C=CC4=O)=O)=O | Vedotin | SK-BR-3 | HER-2 | 4 | Microtubule | 0.46 | 7.46 |
| CC(C)[C@@H](C(N[C@@H](CCCNC(N)=O)C(NC1=CC=C(COC(N(C)[C@@H](C(C)C)C(N[C@@H](C(C)C)C(N([C@@H]([C@@H](C)CC)[C@H](OC)CC(N2[C@@]([C@H](OC)[C@@H](C)C(N[C@H](C)[C@@H](O)C3=CC=CC=C3)=O)([H])CCC2)=O)C)=O)=O)=O)C=C1)=O)=O)NC(CCCCCN4C(C=CC4=O)=O)=O | Vedotin | UACC-812 | HER-2 | 4 | Microtubule | 0.79 | 10.34 |
| CC(C)[C@@H](C(N[C@@H](CCCNC(N)=O)C(NC1=CC=C(COC(N(C)[C@@H](C(C)C)C(N[C@@H](C(C)C)C(N([C@@H]([C@@H](C)CC)[C@H](OC)CC(N2[C@@]([C@H](OC)[C@@H](C)C(N[C@H](C)[C@@H](O)C3=CC=CC=C3)=O)([H])CCC2)=O)C)=O)=O)=O)C=C1)=O)=O)NC(CCCCCN4C(C=CC4=O)=O)=O | Vedotin | EFM-192A | HER-2 | 4 | Microtubule | 2.18 | 8.42 |
| CC(C)[C@@H](C(N[C@@H](CCCNC(N)=O)C(NC1=CC=C(COC(N(C)[C@@H](C(C)C)C(N[C@@H](C(C)C)C(N([C@@H]([C@@H](C)CC)[C@H](OC)CC(N2[C@@]([C@H](OC)[C@@H](C)C(N[C@H](C)[C@@H](O)C3=CC=CC=C3)=O)([H])CCC2)=O)C)=O)=O)=O)C=C1)=O)=O)NC(CCCCCN4C(C=CC4=O)=O)=O | Vedotin | BT-474 | HER-2 | 4 | Microtubule | 2.18 | 7.32 |
| CC(C)[C@@H](C(N[C@@H](CCCNC(N)=O)C(NC1=CC=C(COC(N(C)[C@@H](C(C)C)C(N[C@@H](C(C)C)C(N([C@@H]([C@@H](C)CC)[C@H](OC)CC(N2[C@@]([C@H](OC)[C@@H](C)C(N[C@H](C)[C@@H](O)C3=CC=CC=C3)=O)([H])CCC2)=O)C)=O)=O)=O)C=C1)=O)=O)NC(CCCCCN4C(C=CC4=O)=O)=O | Vedotin | JIMT-1 | HER-2 | 4 | Microtubule | 3.30 | 5.31 |
| CC(C)[C@@H](C(N[C@@H](CCCNC(N)=O)C(NC1=CC=C(COC(N(C)[C@@H](C(C)C)C(N[C@@H](C(C)C)C(N([C@@H]([C@@H](C)CC)[C@H](OC)CC(N2[C@@]([C@H](OC)[C@@H](C)C(N[C@H](C)[C@@H](O)C3=CC=CC=C3)=O)([H])CCC2)=O)C)=O)=O)=O)C=C1)=O)=O)NC(CCCCCN4C(C=CC4=O)=O)=O | Vedotin | OE19 | HER-2 | 4 | Microtubule | 2.51 | 10.15 |
| CC(C)[C@@H](C(N[C@@H](CCCNC(N)=O)C(NC1=CC=C(COC(N(C)[C@@H](C(C)C)C(N[C@@H](C(C)C)C(N([C@@H]([C@@H](C)CC)[C@H](OC)CC(N2[C@@]([C@H](OC)[C@@H](C)C(N[C@H](C)[C@@H](O)C3=CC=CC=C3)=O)([H])CCC2)=O)C)=O)=O)=O)C=C1)=O)=O)NC(CCCCCN4C(C=CC4=O)=O)=O | Vedotin | NCI-N87 | HER-2 | 4 | Microtubule | 1.85 | 10.59 |
| CC(C)[C@@H](C(N[C@@H](CCCNC(N)=O)C(NC1=CC=C(COC(N(C)[C@@H](C(C)C)C(N[C@@H](C(C)C)C(N([C@@H]([C@@H](C)CC)[C@H](OC)CC(N2[C@@]([C@H](OC)[C@@H](C)C(N[C@H](C)[C@@H](O)C3=CC=CC=C3)=O)([H])CCC2)=O)C)=O)=O)=O)C=C1)=O)=O)NC(CCCCCN4C(C=CC4=O)=O)=O | Vedotin | SNU-216 | HER-2 | 4 | Microtubule | Insensitive | 4.92 |
| CC(C)[C@@H](C(N[C@@H](CCCNC(N)=O)C(NC1=CC=C(COC(N(C)[C@@H](C(C)C)C(N[C@@H](C(C)C)C(N([C@@H]([C@@H](C)CC)[C@H](OC)CC(N2[C@@]([C@H](OC)[C@@H](C)C(N[C@H](C)[C@@H](O)C3=CC=CC=C3)=O)([H])CCC2)=O)C)=O)=O)=O)C=C1)=O)=O)NC(CCCCCN4C(C=CC4=O)=O)=O | Vedotin | Hs-578-T | HER-2 | 4 | Microtubule | Insensitive | 3.09 |
| [H][C@](C(C)CC)([C@@H](CC(=O)N1CCC[C@H]1[C@H](OC)[C@@H](C)C(=O)NC(Cc2ccccc2)C(=O)O)OC)N(C)C(=O)[C@@H](NC(=O)C([C@H](C)C)N(C)CCOCCOCCOCCO/N=C(C)/c3ccc(CC(N)C(=O)O)cc3)C(C)C | trastuzumab-pAcF-Amberstatin | JIMT-1 | HER-2 | 2 | Microtubule | 0.23 | 5.31 |
| [H][C@](C(C)CC)([C@@H](CC(=O)N1CCC[C@H]1[C@H](OC)[C@@H](C)C(=O)NC(Cc2ccccc2)C(=O)O)OC)N(C)C(=O)[C@@H](NC(=O)C([C@H](C)C)N(C)CCOCCOCCOCCO/N=C(C)/c3ccc(CC(N)C(=O)O)cc3)C(C)C | trastuzumab-pAcF-Amberstatin | OE19 | HER-2 | 2 | Microtubule | 0.22 | 10.15 |
| [H][C@](C(C)CC)([C@@H](CC(=O)N1CCC[C@H]1[C@H](OC)[C@@H](C)C(=O)NC(Cc2ccccc2)C(=O)O)OC)N(C)C(=O)[C@@H](NC(=O)C([C@H](C)C)N(C)CCOCCOCCOCCO/N=C(C)/c3ccc(CC(N)C(=O)O)cc3)C(C)C | trastuzumab-pAcF-Amberstatin | NCI-N87 | HER-2 | 2 | Microtubule | 0.07 | 10.59 |
